# Supplementary material
Source: publisher figshare collection journal article supplement (https://acs.figshare.com/ndownloader/files/23660626)
Supplement: Supplementary file 1 [file 23660626]

## Sheet: Sigma1
ANN Parameters for σ_1
Output	y	log10(σ1)
Number of hidden neurons	n	50
Input Scaling	xoff	0.0100012		xgain	2.11259
	1x5	-1.58211		1x5	0.296556
		0			2.07149
		-0.986293			0.220846
		-3.54012e-14			2.0522
Hidden Layer	b1	2.27356		M1	2.24842	-1.63113	-0.578548	2.9952	-0.110456
	1x50	-0.345288		5x50	-0.432131	0.912016	-0.346627	-1.09166	-0.138739
		1.84354			0.572129	0.278366	0.0914521	-0.00241613	-0.239177
		0.905355			0.776975	-0.843699	0.198341	1.72641	-0.0993322
		-0.152817			-0.102967	-0.352398	-1.70324	0.598732	-1.07161
		-1.78961			-2.0467	1.3042	0.601271	-2.47683	0.0866397
		0.458358			0.365895	0.203311	1.805	-0.222115	1.36373
		-2.58769			-1.43113	1.20637	1.32213	-1.80966	0.374927
		0.453465			1.78779	0.794313	-0.649452	0.526536	-0.0908357
		1.02571			0.258287	0.0534932	-0.675885	0.990054	-0.639918
		0.918757			1.08374	-1.1843	0.113484	2.14084	-0.114075
		2.1841			2.13648	-0.572182	-0.732985	1.14672	-0.0404396
		-0.558533			-0.318578	-0.105369	-0.705243	-0.410145	-0.662267
		0.489082			-0.549228	1.02286	0.773154	-1.139	-0.378188
		3.01114			0.499575	-1.82513	-6.02524	2.95047	-4.48076
		1.6968			2.20923	-1.45761	-0.638985	2.74809	-0.0959685
		-17.7676			-15.0738	-0.519054	0.0496374	-0.312008	-0.159909
		0.0825617			0.143418	0.388047	1.70751	-0.752452	0.856338
		2.51454			2.45324	-0.634225	-0.86311	0.962081	-0.00202042
		-3.69096			-2.08256	1.98119	2.70437	-3.31313	0.917041
		14.7847			14.6749	-0.631762	-0.81455	1.24415	-0.107112
		0.167046			0.0404731	-0.754317	0.13151	-0.0514147	0.148595
		0.370024			0.0675922	-0.529784	0.312636	0.50542	-0.0198461
		-1.45916			-0.0618451	-1.37902	-0.117811	-0.00673506	-0.0432465
		3.47768			5.16966	0.052841	5.73652	-0.0861454	6.49098
		-2.05036			-1.54722	1.41258	2.28702	-2.56455	0.840721
		11.5809			11.2888	-0.212471	-0.844272	0.527824	-0.164704
		-6.46969			-5.46581	1.43049	1.06205	-4.49795	0.203752
		8.97082			9.05211	-0.744094	-0.226953	1.22439	-0.126585
		6.0003			4.54413	-1.43585	-0.535444	4.21182	-0.165342
		6.9944			2.57376	-0.366219	2.61019	-0.116653	2.28691
		2.48441			2.46088	-0.417925	1.00444	0.7862	0.1025
		6.51216			6.97106	-1.20618	0.424388	1.71117	0.0715127
		-1.32403			-0.382952	0.293303	-0.464646	-1.0814	-0.0977834
		16.124			16.0517	-0.958479	-0.839189	1.79188	-0.118954
		-1.49707			-1.02622	-0.309407	-0.00771638	-0.0743315	0.148217
		1.31964			0.18896	1.12663	0.2976	0.0203595	0.215674
		-2.88284			-1.09075	0.726114	-1.20136	-0.0938845	-1.1379
		9.36734			9.5088	-0.832679	-0.205752	1.34547	-0.116271
		-0.0287078			0.179951	0.840946	0.13848	0.0894655	0.0502289
		0.442279			0.284189	-0.635272	0.475753	-0.0311349	0.388905
		-3.35145			-0.949945	-0.810839	-0.616002	0.0424604	-0.484636
		2.73743			2.66374	-0.416155	-1.04007	0.474626	-0.0222077
		-2.99788			-5.37414	-0.0138153	-6.17504	0.0860109	-6.62831
		-0.765445			-1.14199	-1.29181	1.44891	2.32062	0.043729
		-5.29119			-4.02813	1.52126	1.03626	-4.54309	0.0905004
		0.713977			0.308729	0.0244359	-1.04768	0.929709	-0.734156
		-0.579754			-0.65437	0.431988	1.4	-1.06208	0.802665
		-0.823371			-0.5506	0.0676067	-1.18091	0.103381	-0.260684
		-5.64693			-3.96933	1.48994	0.416074	-4.28043	0.127089
Output Layer	b2	-3.18002		M2	2.93258	-1.25281	9.5675	-2.40479	7.26051	7.28183	2.8048	-12.5827	0.0844024	-6.87554	1.47386	5.95932	-1.01971	0.221847	-5.80807	2.99767	-4.76129	3.99003	-5.63086	4.91385	-3.33837	10.0548	-2.93652	5.84237	-1.61875	1.764	1.79421	-1.92198	-4.5417	-6.33335	-0.167358	0.138132	0.0962826	-1.96099	2.26001	3.47967	4.79756	0.507981	3.97841	3.22545	-7.55657	-4.82819	1.78129	-11.5616	-0.0391644
	1x1			1x50
Output Scaling	yoff	-1		ygain	0.4
	1x1			1x1
[truncated: 5 more columns]

## Sheet: Sigma2
ANN Parameters for σ_2
Output	y	log10(σ2)
Number of hidden neurons	n	20
Input Scaling	xoff	3.62203e-06		xgain	2.21227
	1x5	-2.04746		1x5	0.282705
		0.0104161			2.06663
		-0.986293			0.220846
		0			2.04965
Hidden Layer	b1	-3.34173		M1	-0.0326991	0.139392	-1.94834	1.81464	0.167089
	1x20	0.247055		5x20	0.0163153	-0.045817	-0.137904	-0.635284	-0.0113012
		4.50452			0.590698	0.0126097	0.284221	3.66964	0.0725643
		-1.5454			0.522872	0.121787	-0.55063	1.01836	0.787796
		-4.21802			-0.982611	0.000613439	-1.19618	0.0487162	-1.29897
		-1.18145			-0.0537042	0.0203087	-0.562626	0.486462	-0.0167046
		-0.632733			0.429009	-0.95657	0.817477	0.814342	-0.0864752
		3.98768			1.14269	-0.147094	1.07541	1.69866	0.736696
		0.417108			-0.331011	1.46634	0.22233	1.64537	1.20074
		-0.327133			-0.102909	0.0801349	-0.997319	0.838932	-0.0200716
		3.65966			0.573856	0.482989	0.339328	0.603265	-0.962447
		-1.97582			0.469208	-0.295059	-0.0922844	-1.02941	0.826195
		2.25699			0.514532	0.0223565	-0.0167994	-1.90692	-0.127164
		-1.41299			-0.0859964	0.0779125	-1.17893	1.02454	0.0114501
		-2.73328			-0.401347	0.0228092	-0.942352	-1.73968	-0.0423652
		-0.0980822			-2.04035	-0.00325111	-2.01201	0.0123009	-2.75399
		-2.27775			-0.40967	-0.0258886	-0.0312138	1.33337	0.0990046
		0.824843			2.23381	0.0429548	2.02783	-0.0101676	2.96577
		4.46434			1.21433	0.00105821	1.39025	0.0148368	1.60979
		-2.39824			-0.117777	-0.0286433	-0.56482	-1.33334	0.118377
Output Layer	b2	-0.259972		M2	-0.723112	-1.36134	-0.649604	0.339572	-3.21041	5.67689	0.0559652	0.270753	-0.00229782	-0.524682	1.1225	1.25943	-0.719988	-1.27695	0.883616	-2.01555	-2.07281	-0.545708	-1.23734	-3.17051
	1x1			1x20
Output Scaling	yoff	-0.849485		ygain	0.238668
	1x1			1x1

## Sheet: SigmaInf
ANN Parameters for σ_inf
Output	y	σ∞
Number of hidden neurons	n	50
Input Scaling	xoff	0.0100012		xgain	2.11918
	1x5	-1.58211		1x5	0.296556
		0			2.07149
		-0.986293			0.258531
		-3.54012e-14			2.0522
Hidden Layer	b1	0.420597		M1	0.224289	-0.822326	-0.0237028	-0.304006	0.14059
	1x50	-0.577081		5x50	-0.352715	-0.357119	-0.374984	-0.291544	-1.41888
		2.2093			0.098109	0.0480601	0.184229	0.125958	1.57681
		-0.522518			-0.277331	0.0141365	-0.102275	-0.210284	-0.550462
		-0.0689338			1.06856	0.230899	1.64184	-0.179245	3.00411
		2.52543			-0.0428376	-0.106839	0.0606099	0.164052	1.87322
		0.112931			-0.171536	-0.796119	-0.00353877	-0.126511	0.142912
		0.813414			-0.238092	-0.166316	0.743633	0.537685	0.292271
		-0.177983			0.245308	0.0249102	-0.046407	-0.34495	-0.350031
		-1.38152			0.271866	0.240412	-0.331786	-1.324	0.427746
		0.158377			-0.741219	0.901663	-0.21537	-0.443713	-0.772832
		-0.245285			-0.401771	0.384803	-0.270926	-0.0901347	-0.754257
		0.120381			-0.312281	-0.316415	0.902397	0.494023	0.770294
		-0.181499			-0.484114	-0.519854	-0.829024	-0.0181427	-1.66034
		-0.594914			0.248585	0.179993	0.282837	-1.48107	0.749024
		-0.191062			0.367575	0.367585	-1.00841	-0.563991	-0.92279
		-0.216989			-2.88527	2.15784	-2.52085	0.0966701	-3.54434
		0.000462877			0.327411	0.457776	-0.0942019	0.189828	0.270689
		-0.174409			-1.13916	0.212918	-1.61176	0.30903	-2.57948
		-0.63582			-0.162303	0.0654013	-0.587827	0.426356	-0.439267
		-0.152483			-0.601903	-0.28116	-0.629144	1.21675	-0.91971
		0.899215			-0.377779	-0.202301	0.110332	-0.0330103	0.360252
		0.386168			-0.0862124	0.00790265	0.574658	0.237348	2.12136
		0.0114454			0.286601	1.38047	-1.1087	-0.179132	-1.47808
		0.746386			0.447061	-0.0689285	-0.141478	0.0908803	-0.530676
		-0.509677			-0.44786	0.219001	0.703662	-0.914827	-0.114081
		-0.817727			-0.0894644	-0.823528	0.545406	0.258356	0.765995
		-0.312115			-0.0922816	-0.212859	0.241266	0.40809	0.0978913
		0.15721			-0.341377	-0.496302	0.367078	-0.0977033	0.513832
		-0.252168			0.268889	0.210179	1.76946	-2.48936	1.69696
		-0.796264			0.438889	-2.0682	-0.128848	0.0368442	0.218164
		-1.40727			-0.28161	-0.366164	-0.196232	-0.561217	-1.52706
		-1.04456			-0.680707	0.275885	-1.11099	0.688278	-1.50392
		-0.548732			0.549543	-2.36811	-0.0538976	0.0971936	0.439846
		-0.421337			-0.516043	0.268766	0.660808	-0.887284	-0.0581806
		1.14437			0.489026	0.0645155	0.543426	-0.0122218	-0.0284878
		-0.257428			-0.3154	-1.11813	0.93156	0.11317	1.22481
		-0.112037			0.397704	0.226702	0.56136	-1.86996	1.0652
		-0.115499			0.0023071	-0.226585	-0.938373	1.29886	-0.63996
		0.113392			-0.599312	0.417315	0.112926	-0.351718	0.0231477
		0.767491			0.0917817	0.0735027	0.941986	0.428939	2.85048
		-1.26586			-0.00350696	-1.65016	-0.168887	0.00872014	0.0156467
		-0.591256			-0.3575	-0.530061	-0.217374	-0.00905011	-0.520258
		-1.72826			-0.694101	-1.8601	1.75942	0.122673	2.24654
		0.572022			0.584128	-1.27173	0.789416	-0.20976	0.150791
		1.08306			0.231646	0.092187	1.2664	0.627649	3.47367
		2.19549			0.213861	0.292255	0.31415	-0.809	0.692107
		2.90275			0.147847	0.858467	-1.53441	0.350779	-2.95623
		0.727954			-0.282684	2.66193	0.0246802	-0.15985	-0.582111
		-4.03542			-7.4301	-0.0908008	-8.20045	0.16632	-9.8202
Output Layer	b2	0.206311		M2	0.426589	-0.683241	1.91635	1.32729	1.34423	-0.955212	-1.01661	0.635142	1.4551	-1.28058	-0.675658	1.20073	1.8062	-0.774641	2.58465	0.981372	-2.08883	-1.07665	1.62707	1.55136	-0.542707	2.08319	1.25793	0.804321	2.9259	0.654885	-3.62519	-2.53402	2.07787	-0.355156	1.71008	-0.206039	0.289715	-0.983689	-0.638247	-0.755559	2.71928	-0.773025	0.567918	-1.00862	-1.31721	-1.61766	-1.32303	0.864266	0.0361032
	1x1			1x50
Output Scaling	yoff	0		ygain	2.07538
	1x1			1x1
[truncated: 5 more columns]
